1 **Title:** Walking Activities during the Acute Stroke Hospital Stay May Benefit Cerebrovascular  
2 Health

3  
4 Alicen A. Whitaker, DPT<sup>1</sup>; Madison L. Henry, BS<sup>1</sup>; Allegra Morton, DPT<sup>1</sup>; Jaimie L. Ward,  
5 MS<sup>1</sup>; Sarah M. Eickmeyer, MD<sup>2</sup>; Michael G. Abraham, MD<sup>3,5</sup>; Sandra A. Billinger, PT,  
6 PhD<sup>1,2,3,4</sup>

7  
8 <sup>1</sup>Department of Physical Therapy and Rehabilitation Science, University of Kansas Medical  
9 Center, Kansas City, KS

10 <sup>2</sup>Department of Physical Medicine and Rehabilitation, University of Kansas Medical Center,  
11 Kansas City, KS

12 <sup>3</sup>Department of Neurology, University of Kansas Medical Center, Kansas City, KS

13 <sup>4</sup>Department of Integrative and Molecular Physiology, University of Kansas Medical Center,  
14 Kansas City, KS

15 <sup>5</sup>Department of Interventional Radiology, University of Kansas Medical Center, Kansas City, KS

16  
17 **Corresponding Author:**

18 Sandra A. Billinger, PT, PhD

19 Address: 3901 Rainbow Blvd, Mail Stop 2002, Kansas City, KS 66160

20 Phone: 913-945-6685

21 Fax: 913-588-9428

22 Email: sbillinger@kumc.edu

23 **Abstract**

24 **Purpose:** Physical activity within the hospital post-stroke is recommended for cardiovascular  
25 and musculoskeletal health, but no studies have examined cerebrovascular health. We  
26 hypothesized individuals who walked farther distances (FARhigh) in the hospital would have a  
27 higher resting middle cerebral artery blood velocity (MCAv) and a greater cerebrovascular  
28 response (CVR) to moderate-intensity exercise at 3-months post-stroke, compared to individuals  
29 who walked shorter distances (FARlow).

30 **Methods:** At 3-month post-stroke, we recorded 90-seconds of baseline (BL) MCAv followed by  
31 6-minutes of moderate-intensity exercise. We calculated CVR as the change in MCAv from BL  
32 to steady-state exercise. We collected farthest distance walked from the electronic medical  
33 record. We divided individuals based on average farthest walking distance, (FARhigh or  
34 FARlow).

35 **Results:** Participants (n = 20) were  $63 \pm 15$  years. BL MCAv was not different between groups  
36 ( $p = 0.07$ ). In comparison to FARlow, we report a higher CVR in FARhigh's ipsilesional ( $\bar{x} =$   
37  $7.38 \pm 5.42$  vs  $\bar{x} = 2.19 \pm 3.53$ ,  $p = 0.02$ ) and contralesional hemisphere ( $\bar{x} = 8.15 \pm 6.37$  vs  $\bar{x} =$   
38  $2.06 \pm 4.76$ ,  $p = 0.04$ ).

39 **Conclusions:** Physical activity during the hospital stay post-stroke may support cerebrovascular  
40 health after discharge. Prospective studies are needed to support this finding.

41 **Key Words:** Cardiovascular Rehabilitation, Middle Cerebral Artery Blood Velocity, Brain  
42 Health

## 43 **Introduction and Purpose**

44 After stroke, light to moderate physical activity is recommended during the acute hospital stay to  
45 improve cardiovascular and musculoskeletal health.<sup>1</sup> Physical activity is also recommended for  
46 cerebrovascular health in aging older adults and individuals with stroke.<sup>2-5</sup> However, it is well  
47 documented that individuals post-stroke within the acute hospital spend the majority of their day  
48 inactive.<sup>6-9</sup> Recently, research initiatives are investigating increased physical activity during the  
49 acute hospital stay post-stroke.<sup>1</sup> While studies have examined motor function and self-reported  
50 disability outcomes with increased physical activity during the acute hospital stay,<sup>10-12</sup> no studies  
51 have examined the cerebrovascular system. Adequate perfusion and regulation of cerebral blood  
52 flow is essential for the brain to function properly. Therefore, stroke rehabilitation research  
53 should include measures of cerebrovascular health to increase our understanding regarding the  
54 relationship between physical activity and brain health.<sup>13</sup>

55  
56 Our prior work has shown middle cerebral artery blood velocity (MCAv), a surrogate measure of  
57 cerebral blood flow, is constant at rest and increases with submaximal exercise in healthy aging  
58 adults and stroke.<sup>14-18</sup> We report no significant differences in MCAv during seated rest in  
59 individuals at 3-months post-stroke compared to age- and sex-matched adults.<sup>18</sup> However, when  
60 we challenged the system with moderate-intensity exercise, individuals 3-months post-stroke had  
61 a reduced cerebrovascular response (CVR) compared to controls.<sup>18</sup> CVR is defined as the  
62 change in MCAv from rest to steady-state exercise and has been positively associated with  
63 cardiovascular health in older adults<sup>19</sup> and aerobic fitness in individuals with stroke.<sup>17</sup> Further  
64 investigation in individuals at 3- and 6-months post-stroke showed a greater CVR to moderate-  
65 intensity exercise in individuals who reported being physically active and had a higher non-

66 exercise estimated maximal oxygen uptake ( $VO_{2max}$ ) compared to those who reported being  
67 inactive or sedentary.<sup>17</sup> Collectively, these findings suggest physical activity engagement could  
68 prove beneficial to cerebrovascular health following stroke. Therefore, the next step in our line  
69 of research was to explore physical activity within the acute hospital and cerebrovascular health  
70 post-stroke.

71  
72 The objective of this secondary analysis was to assess walking during the acute stroke hospital  
73 stay and MCAv at 3-months. We hypothesized that individuals who walked farther within the  
74 acute hospital post-stroke (FARhigh) would have 1) a higher resting MCAv at baseline (BL) and  
75 2) a greater CVR at 3-months post-stroke, compared to individuals who walked shorter distances  
76 (FARlow).

77

## 78 **Methods**

### 79 *Recruitment*

80 The primary study, characterizing the longitudinal changes in MCAv at rest and during exercise  
81 post-stroke, has previously published the recruitment<sup>20</sup> and methodology details.<sup>17</sup> Briefly,  
82 participants were included if they met the following criteria: 1) Age 35 to 95 years old, 2)  
83 unilateral ischemic stroke, 3) less than 70% carotid stenosis observed on imaging, 4) physician  
84 approval to perform moderate-intensity exercise, and 5) able to walk more than 10 meters  
85 without physical assistance. Participants were excluded if they 1) were unable to consent due to  
86 global aphasia, 2) were not able to perform exercise on a seated stepper, 3) had another  
87 neurologic disorder such as Parkinson's disease, Alzheimer's disease, or Multiple Sclerosis, or 4)  
88 were dependent on supplemental oxygen. For this secondary analysis, we also excluded

89 participants if their acute hospital stay was not at the University of Kansas Health System, where  
90 the walking data was collected from the electronic medical record (EMR). The University of  
91 Kansas Medical Center Human Subjects Committee approved this study and all the experimental  
92 procedures. Participants provided informed written consent prior to the start of study procedures.

93

#### 94 *Electronic Medical Record*

95 We used the University of Kansas Health System's daily activity spreadsheet within the EMR to  
96 examine walking during the acute hospital stay post-stroke. The interdisciplinary teams at the  
97 University of Kansas Hospital System monitors patient progress through the daily activity  
98 spreadsheet, where walking distance (in feet) and frequency of out-of-bed activities are recorded.  
99 The walking data collected from the daily activity spreadsheet was standard of care on the stroke  
100 unit. No information was available whether patients with stroke were following published early  
101 out of bed activity or rigorous walking protocols.<sup>10,21</sup>

102

#### 103 *Study Visit at 3-Months Post-Stroke*

104 Prior to the visit, participants were asked to refrain from caffeine for 6 hours, food for 2 hours,  
105 and vigorous exercise for 12 hours. Participants came to the laboratory at 3-months post-stroke  
106 for the study visit. As previously published, we collected demographics and past medical  
107 information, completed questionnaires, and performed an exercise familiarization session prior to  
108 the MCAv recordings.<sup>17</sup> Participants practiced stepping on a recumbent stepper (T5XR NuStep,  
109 Inc. Ann Arbor, MI) at a constant rate of 90 steps per minute while we determined the resistance  
110 for moderate-intensity exercise (45-55% heart rate reserve).<sup>22</sup> If a participant was on beta-  
111 blocker medication the estimated maximal heart rate equation was used ( $164 - (0.7 \times \text{age})$ ).<sup>23</sup> To

112 ensure accurate measures of end-tidal carbon dioxide ( $P_{ET}CO_2$ ), participants also practiced  
113 breathing through their nose during exercise.

114

### 115 MCAv Recording

116 Next, we donned the following equipment: 1) 2-MHz transcranial Doppler ultrasound (TCD)  
117 probes secured with an adjustable headband (Multigon Industries Inc, Yonkers, New York) to  
118 monitor bilateral MCAv, 2) a 5-lead electrocardiogram ((ECG; Cardiocard, Nasiff Associates,  
119 Central Square, New York) to monitor HR, 3) a nasal cannula attached to a capnography (BCI  
120 Capnocheck Sleep 9004 Smiths Medical, Dublin, Ohio) to monitor  $P_{ET}CO_2$ , and 4) a beat-to-beat  
121 blood pressure cuff on the left middle finger (Finometer, Finapres Medical Systems, Amsterdam,  
122 the Netherlands) to monitor mean arterial pressure (MAP).

123

124 Aligned with our prior work, we calculated BL MCAv as an average of the 90 second seated rest  
125 before the onset of moderate-intensity exercise. CVR was calculated as the difference between  
126 BL and the average steady state exercise MCAv (minutes 3 to 4.5).<sup>14,17,18,24</sup> After the cool down,  
127 participants rested to allow HR to return to near BL values. Following the rest, participants  
128 performed a 6-minute walk test (6MWT) in a hallway with no distractions. We conducted the  
129 6MWT according to the guidelines from the American Thoracic Society.<sup>25</sup>

130

### 131 *Statistical Analysis*

132 Data are reported as means  $\pm$  standard deviations unless otherwise indicated. Alpha was set a  
133 priori at  $\leq 0.05$ . Normality for each variable was determined using a Shapiro-Wilk test. Based on  
134 the farthest walking data collected from the EMR, participants were divided into groups.

135 Individuals that walked more than the average farthest distance (FARhigh) during the acute  
136 hospital stay were compared to individuals who walked less than the average farthest distance  
137 (FARlow). Participant characteristics were compared between FARhigh and FARlow using a  
138 One-way Analysis of Variance (ANOVA), Kruskal-Wallis test for non-parametric variables, and  
139 Fisher exact test for categorical variables. Measures of MCAv and exercise fidelity were  
140 compared between groups using a One-way Analysis of Variance (ANOVA) and Kruskal-Wallis  
141 test for non-parametric variables.

142

### 143 **Results**

144 Of the 27 participants consented into the primary study, 20 individuals were included within this  
145 secondary analysis (40% women, age  $63 \pm 15$  years).<sup>17</sup> One participant had 2 stroke events  
146 separated by one year. Due to our interest in comparing the ipsilesional and contralesional  
147 MCAv, the second stroke was excluded within this analysis.<sup>24</sup> We also excluded individuals who  
148 did not have a valid MCAv signal at rest (n=3) or during exercise (n=1) and individuals who  
149 were not admitted to the University of Kansas Health System (n=2) as we were interested in the  
150 daily activity tracker within their electronic medical record. There were no significant  
151 differences between groups for stroke characteristics or treatment interventions, shown in **Table**  
152 **1**.

153

154 **Table 1. Participant Characteristics**

*FARhigh (n=11)*    *FARlow (n=9)*    *P value*

#### Collected at 3-Months

|             |         |         |      |
|-------------|---------|---------|------|
| Age (years) | 59 (16) | 68 (14) | 0.18 |
|-------------|---------|---------|------|

|                                               |               |               |      |
|-----------------------------------------------|---------------|---------------|------|
| Females (n (%))                               | 4 (36%)       | 4 (44%)       | 1.00 |
| Race (n (%)) *                                |               |               |      |
| African American                              | 3 (27%)       | 4 (44%)       | 0.64 |
| Native American                               | 1 (9%)        | 0             | 1.00 |
| Asian                                         | 1 (9%)        | 0             | 1.00 |
| Caucasian                                     | 8 (73%)       | 5 (56%)       | 0.64 |
| Body Mass Index                               | 30.7 (5.2)    | 29.1 (6.3)    | 0.55 |
| Beta Blocker Medication (n (%))               | 7 (64%)       | 9 (100%)      | 0.09 |
| Modified Rankin Scale (n (%))                 |               |               |      |
| No Symptoms                                   | 0             | 0             |      |
| No Significant Disability                     | 4 (36%)       | 2 (22%)       |      |
| Slight Disability                             | 4 (36%)       | 5 (56%)       |      |
| Moderate Disability                           | 2 (18%)       | 1 (11%)       |      |
| Moderately Severe Disability                  | 1 (9%)        | 1 (11%)       |      |
| Severe Disability                             | 0             | 0             | 0.91 |
| Six Minute Walk Test (m)                      | 340.3 (103.5) | 264.6 (160.3) | 0.22 |
| <b>Collected from EMR</b>                     |               |               |      |
| Number of Days Between Stroke and Study Visit | 93 (10)       | 99 (15)       | 0.29 |
| Length of Hospital stay (days)                | 6 (2.8)       | 5 (1.8)       | 0.50 |
| Lesion Size (cm <sup>3</sup> ) ^              | 71.9 (99.2)   | 6.7 (10.4)    | 0.27 |
| NIH Stroke Scale upon Admission†              | 10 (7.6)      | 6 (5.1)       | 0.13 |

|                      |         |         |      |
|----------------------|---------|---------|------|
| TPA (n (%))          | 5 (45%) | 3 (33%) | 0.67 |
| Thrombectomy (n (%)) | 4 (36%) | 1 (11%) | 0.32 |

Mean (Standard Deviation) unless otherwise indicated. \*One participant selected multiple races. EMR = Electronic Medical Record. NIH = National Institutes of Health. TPA = Tissue Plasminogen Activator. ^ = FARhigh (n=10) and FARlow (n=7). † = FARlow (n=8)

155  
156 The participants' average farthest walking distance within the acute hospital post-stroke was 340  
157 feet (SD = 225). FARhigh, characterized as  $\geq 340$  feet, had an average farthest walking distance  
158 of 508 feet (SD = 136). FARlow, characterized as  $< 340$  feet, had an average farthest walking  
159 distance of 134 feet (SD = 103). We also examined the frequency these individuals walked per  
160 day during the acute hospital stay and found no significant difference between FARhigh ( $\bar{x} = 2.0$   
161  $\pm 0.4$  times per day,) and FARlow ( $\bar{x} = 1.9 \pm 0.7$  times per day,  $p = 0.53$ ). At the visit 3-months  
162 post-stroke, the 6MWT distance, revealed no significant difference between group differences ( $p$   
163 = 0.22). However, we report the difference was clinically meaningful with FARhigh walking 75  
164 meters farther than FARlow.<sup>26</sup>

165  
166 *MCAv at 3-Months Post-Stroke*

167 We found no significant differences between FARhigh and FARlow for BL MCAv within the  
168 ipsilesional and contralesional hemisphere, shown in **Table 2**. One individual within the FARlow  
169 group had a high contralesional resting MCAv. We assessed whether the data met criteria for an  
170 outlier and warranted removal from the data analysis. The resting MCAv data point was  
171 determined to not be an outlier and remained for all analyses. During moderate-intensity

172 exercise, FARhigh had a greater CVR within the ipsilesional hemisphere compared to FARlow  
 173 ( $p = 0.02$ ). The CVR to moderate-intensity exercise within the contralesional hemisphere was  
 174 also greater within FARhigh compared to FARlow ( $p = 0.04$ ).

175

176 **Table 2. MCAv Response between FARhigh and FARlow**

|                                   | <i>FARhigh</i><br>( <i>n</i> =11) | <i>FARhigh</i><br>95% CI | <i>FARlow</i><br>( <i>n</i> =9) | <i>FARlow</i><br>95% CI | <i>P</i> value |
|-----------------------------------|-----------------------------------|--------------------------|---------------------------------|-------------------------|----------------|
| <b>Ipsilesional Hemisphere</b>    |                                   |                          |                                 |                         |                |
| BL MCAv<br>(cm/s)                 | 46.83 (11.32)                     | 40.16 – 53.37            | 59.99 (18.82)                   | 46.80 – 71.90           | 0.07           |
| CVR<br>(cm/s)                     | 7.38 (5.42)                       | 4.35 – 10.73             | 2.19 (3.53)                     | 0.02 – 4.40             | <b>0.02</b>    |
| <b>Contralesional Hemisphere*</b> |                                   |                          |                                 |                         |                |
| BL MCAv<br>(cm/s)                 | 54.36 (10.37)                     | 47.85 – 60.79            | 75.09 (30.57)                   | 56.37 – 99.30           | 0.07           |
| CVR<br>(cm/s)                     | 8.15 (6.37)                       | 4.47 – 11.96             | 2.06 (4.76)                     | -1.42 – 5.31            | <b>0.04</b>    |

Mean (Standard Deviation). 95% Confidence Intervals. BL = Baseline, MCAv = Middle Cerebral Artery Blood Velocity, cm/s = centimeters per second, CVR = Cerebrovascular Response. \*FARhigh (*n*=10) and FARlow (*n*=8)

177

178 *Blood Pressure, Respiration, and Heart Rate*

179 MAP, P<sub>ET</sub>CO<sub>2</sub>, and HR at BL and steady state exercise are shown in **Table 3**. MAP and HR were  
 180 not different between groups and were unlikely to contribute to the difference in CVR between  
 181 groups. While P<sub>ET</sub>CO<sub>2</sub> was significantly higher in the FARhigh group, which could result in a  
 182 higher MCAv, the change from BL to steady state exercise P<sub>ET</sub>CO<sub>2</sub> was not different between  
 183 FARhigh ( $\bar{x} = 3.69 \pm 2.17$ ,) and FARlow ( $\bar{x} = 4.19 \pm 2.40$  p = 0.64). Therefore, the change in  
 184 P<sub>ET</sub>CO<sub>2</sub> was not likely the driving factor for a higher CVR within the FARhigh group. Both  
 185 groups also performed similar effort during the moderate-intensity exercise as workload, HR,  
 186 and RPE were not different.

187

188 **Table 3. Exercise Fidelity Measures**

|                                            | <i>FARhigh</i><br>(n=11) | <i>FARhigh</i><br>95% CI | <i>FARlow</i><br>(n=9) | <i>FARlow</i><br>95% CI | <i>P</i><br>value |
|--------------------------------------------|--------------------------|--------------------------|------------------------|-------------------------|-------------------|
| BL MAP (mmHg)                              | 74.4 (19.9)              | 62.8 – 86.0              | 80.2 (23.8)            | 64.5 – 95.8             | 0.56              |
| SS MAP (mmHg)                              | 90.5 (24.2)              | 75.8 – 104.0             | 96.6 (25.9)            | 78.8 – 113.2            | 0.59              |
| BL P <sub>ET</sub> CO <sub>2</sub> (mmHg)* | 37.1 (4.1)               | 34.6 – 39.8              | 31.9 (2.9)             | 30.2 – 33.9             | <b>0.01</b>       |
| SS P <sub>ET</sub> CO <sub>2</sub> (mmHg)* | 40.7 (4.1)               | 38.4 – 43.3              | 36.1 (3.5)             | 33.9 – 38.6             | <b>0.02</b>       |
| BL HR (bpm)                                | 69.8 (9.6)               | 64.1 – 75.4              | 65.4 (10.8)            | 57.7 – 72.6             | 0.35              |
| SS HR (bpm)                                | 92.2 (15.3)              | 83.4 – 101.7             | 92.8 (17.0)            | 81.1 – 102.6            | 0.93              |
| Workload (Watts)                           | 47 (27.2)                | 32.3 – 63.9              | 41 (14.7)              | 32.1 – 50.6             | 1.00              |
| RPE                                        | 13 (3.1)                 | 10.8 – 14.5              | 14 (2.1)               | 12.4 – 15.2             | 0.37              |

Mean (Standard Deviation). 95% Confidence Intervals. BL = Baseline, SS = Steady State

Exercise, MAP = Mean Arterial Pressure, mmHg = millimeters of mercury,  $P_{ET}CO_2$  = End Tidal Carbon Dioxide, HR = Heart Rate, bpm = beats per minute, RPE = Rating of Perceived Exertion. \* = FARhigh (n=10)

---

189

## 190 **Discussion**

191 With recent research, such as the A Very Early Rehabilitation (AVERT) trial, underlying the  
192 importance of dosing physical activity within the acute hospital for stroke recovery at 3-months,  
193 this study contributes toward filling the gaps in knowledge. We hypothesized that individuals  
194 who performed more physical activity, such as walking farther, during the acute hospital stay  
195 post-stroke would have a higher resting MCAv and greater CVR to moderate-intensity exercise  
196 at 3-months. While our hypotheses were only partially supported by our findings, those who  
197 walked farther distances within the hospital had a greater CVR to moderate-intensity exercise at  
198 3-months. Therefore, we report standard of care walking and motivating individuals to perform  
199 physical activity during the acute hospital stay post-stroke may contribute to cerebrovascular  
200 health with recovery.

201

### 202 Resting MCAv

203 Our study found no significant differences in BL MCAv between FARhigh and FARlow. Our  
204 finding is similar to previous work showing no differences in resting MCAv with more out-of-  
205 bed mobility at 52 hours post-stroke compared to less out-of-bed mobility at 7 days.<sup>27</sup> This result  
206 on the contralesional MCAv may be driven by the individual with the higher resting value. As  
207 shown in Table 2, the FARlow group shows a large standard deviation and is likely influencing  
208 these results. We acknowledge the small sample size may be a contributing factor. Despite these

209 limitations, the findings contribute novel information and begin to address a scientific gap in  
210 knowledge. We acknowledge many factors may influence the resting MCAv values 3 months  
211 later such as medication, spontaneous stroke recovery, participation in physical therapy  
212 interventions and physical activity engagement after discharge.

213

### 214 Cerebrovascular Response

215 Individuals who walked farther distances within the acute hospital had a higher CVR to the  
216 exercise stimuli at 3-months post-stroke. While blood pressure, heart rate, and carbon dioxide  
217 increased from baseline to moderate-intensity exercise, the change scores were not significantly  
218 different between groups and were unlikely to contribute to the difference in CVR. Instead, the  
219 higher CVR to an acute bout of exercise could be due to the positive influence of physical  
220 activity and walking on vascular health by reducing oxidative stress and increasing vasomotor  
221 reactivity<sup>28-31</sup> during the hospital stay. Previous work reported an 8-week physical activity  
222 intervention during subacute stroke reduced oxidative stress<sup>32</sup> and a 6-month walking  
223 intervention in chronic stroke increased the ability of the cerebrovascular system to vasodilate  
224 and vasoconstrict.<sup>31</sup> Our previous work has shown that self-reported physical activity at 3- and 6-  
225 months post stroke was associated with a greater CVR than those reporting low physical activity  
226 levels.<sup>17</sup> Indeed, increased physical activity within the acute hospital and after discharge may  
227 contribute to a greater responsiveness of the cerebrovascular system during stroke recovery.  
228 Future work should study physical activity through accelerometry or mobile devices at hospital  
229 discharge to ensure better physical activity characterization. This information would increase our  
230 understanding regarding how physical activity influences cerebrovascular health following

231 stroke. Our findings, presented here, provide foundational information regarding out of bed  
232 activity during the hospital stay and cerebrovascular health at 3 months post-stroke.

233

#### 234 Walking Frequency and Endurance

235 The frequency walked during the acute hospital stay was standard of care and did not follow the  
236 recommendations from the AVERT trial. The AVERT trial reported individuals who performed  
237 short bouts of physical activity approximately 10x/day had more favorable outcomes at 3-months  
238 post-stroke, such as lower self-reported disability symptoms.<sup>13,21</sup> Therefore, an average walking  
239 frequency of 2x/day, reported within this study, may be too low to have an impact on  
240 cerebrovascular health. Previous studies in healthy adults have also reported a frequency of  
241 walking every 30 minutes, preserves resting MCAv throughout the day compared to sedentary  
242 prolonged sitting.<sup>33,34</sup> Therefore, walking at a greater frequency may be needed to increase  
243 resting MCAv in individuals post-stroke.<sup>10,33,34</sup>

244

245 While this study separated individuals into groups based on the average farthest distance walked  
246 during the acute stroke hospital stay, functionally, 340 feet is the ability of an individual to walk  
247 the length of a soccer field or low-level walking within the community.<sup>35</sup> Therefore, further  
248 walking during the acute hospital stay could have encouraged individuals to continue performing  
249 physical activity within the community after discharge from the hospital. While not statistically  
250 significant, this study did show that individuals who walked farther during the acute hospital stay  
251 also had a clinically meaningful higher walking endurance during the 6MWT at 3-months. The  
252 study's higher walking endurance of more than 50 meters during the 6MWT has been reported to  
253 be "substantially meaningful" to quality of life.<sup>26</sup> Although we didn't collect information

254 regarding lower extremity function or balance, the modified Rankin score at our 3 months post-  
255 stroke visit suggests no significant differences for disability between the groups. Therefore,  
256 lower extremity function may not be a primary factor for the 6MWT distance and during the  
257 acute exercise bout.

258

### 259 Role of Physical Therapy for Cerebrovascular Health

260 This study is timely for physical therapy, as activity within the hospital has been highlighted as  
261 an important factor for stroke recovery that requires further research.<sup>1,10,13</sup> Physical therapists and  
262 physical therapy assistants have instrumental roles in advocating for and providing out-of-bed  
263 activities that may contribute to long-term cerebrovascular health. Recent reviews underscore the  
264 importance of mobility interventions post-stroke (i.e. head-of-bed tilt and aerobic exercise) for  
265 MCAv, which could be significant for rehabilitation success.<sup>13,36</sup> After a stroke, one study  
266 reported a higher MCAv upon admission to inpatient stroke rehabilitation was associated with  
267 improved Functional Independence Measure (FIM) scores at discharge.<sup>37</sup> Studies in healthy  
268 adults also report prolonged inactivity was associated with a decrease in MCAv,<sup>33,38</sup>  
269 cardiovascular mortality,<sup>39</sup> and a longer cognitive reaction time.<sup>40</sup> Further research is needed to  
270 determine whether performing physical activity and walking farther distances within the acute  
271 hospital to increase measures of MCAv is associated with improved functional recovery during  
272 inpatient rehabilitation.

273

### 274 *Limitations*

275 While this study provides an important future direction for prospectively collecting physical  
276 activity during the acute hospital and cerebrovascular health during stroke recovery, there are

277 several limitations to consider due to the retrospective study design. First, walking data during  
278 the acute hospital stay was not prospectively collected and we were also not able to collect  
279 information regarding the length of time from stroke onset to the start of walking within the  
280 hospital. Therefore, we are unable to provide further details on the timeline to begin walking  
281 further distances post-stroke. Second, heart rate was not recorded during walking within the  
282 acute hospital stay and therefore we do not know what intensity these individuals were walking.  
283 Third, this study was not powered to detect statistical significance. Due to a small sample size,  
284 confounding factors such as age, sex, and medications were not statistically controlled. Finally,  
285 MCAv is linearly related to blood flow when a constant MCA diameter is maintained,<sup>41</sup> which  
286 has been shown during various conditions including moderate-intensity exercise.<sup>42-44</sup> Consistent  
287 with our previously published work in stroke, we assumed arterial diameter was maintained.<sup>17,18</sup>

288

## 289 **Conclusions**

290 This retrospective analysis is the first to report increased physical activity during the acute  
291 hospital stay and a greater cerebrovascular response at 3-months post-stroke. This study suggests  
292 that physical therapists may impact motor function as well as brain health by providing the  
293 motivation, support, and patient education needed to be more physically active during the acute  
294 hospital stay post-stroke. Physical therapists need to consider physical activity for  
295 cerebrovascular health post-stroke as it relates to cognition,<sup>45</sup> neuroplasticity,<sup>46</sup> and functional  
296 outcomes.<sup>37,47</sup> A prospective research study to confirm these retrospective findings is the next  
297 necessary step for neurovascular stroke rehabilitation.

298

## 299 **Acknowledgements**

300 Dr. Billinger was supported by the Eunice Kennedy Shriver National Institute of Child Health  
301 and Human Development (K01HD067318). Dr. Whitaker, Ms. Morton, and Ms. Henry received  
302 support by the Eunice Kennedy Shriver National Institute of Child Health and Human  
303 Development (T32HD057850). Ms. Morton received a Student Scholarship in Cerebrovascular  
304 Disease and Stroke from the American Heart Association. REDCap at KU Medical Center is  
305 supported by the Clinical and Translational Science Award (UL1TR000001) from the National  
306 Center for Research Resources and National Center for Advancing Translational Science. The  
307 National Center for Advancing Translational Science awarded to the University of Kansas  
308 Frontiers the Clinical and Translational Science Institute (UL1TR002366). The contents are  
309 solely the responsibility of the authors and do not necessarily represent the official views of the  
310 NIH.

311 **References**

- 312 1. Billinger SA, Arena R, Bernhardt J, et al. Physical activity and exercise recommendations  
313 for stroke survivors: a statement for healthcare professionals from the American Heart  
314 Association/American Stroke Association. *Stroke*. 2014;45(8):2532-2553.
- 315 2. Izzo C, Carrizzo A, Alfano A, et al. The Impact of Aging on Cardio and Cerebrovascular  
316 Diseases. *Int J Mol Sci*. 2018;19(2).
- 317 3. Benedictus MR, Leeuwis AE, Binnewijzend MA, et al. Lower cerebral blood flow is  
318 associated with faster cognitive decline in Alzheimer's disease. *Eur Radiol*.  
319 2017;27(3):1169-1175.
- 320 4. Bangen KJ, Werhane ML, Weigand AJ, et al. Reduced Regional Cerebral Blood Flow  
321 Relates to Poorer Cognition in Older Adults With Type 2 Diabetes. *Front Aging*  
322 *Neurosci*. 2018;10:270.
- 323 5. Schuff N, Matsumoto S, Kmiecik J, et al. Cerebral blood flow in ischemic vascular  
324 dementia and Alzheimer's disease, measured by arterial spin-labeling magnetic resonance  
325 imaging. *Alzheimers Dement*. 2009;5(6):454-462.
- 326 6. Matlage AE, Redlin SA, Rippee MA, Abraham MG, Rymer MM, Billinger SA. Use of  
327 Accelerometers to Examine Sedentary Time on an Acute Stroke Unit. *J Neurol Phys*  
328 *Ther*. 2015;39(3):166-171.
- 329 7. Bernhardt J, Dewey H, Thrift A, Donnan G. Inactive and alone: physical activity within  
330 the first 14 days of acute stroke unit care. *Stroke*. 2004;35(4):1005-1009.
- 331 8. Sjöholm A, Skarin M, Churilov L, Nilsson M, Bernhardt J, Linden T. Sedentary  
332 behaviour and physical activity of people with stroke in rehabilitation hospitals. *Stroke*  
333 *Res Treat*. 2014;2014:591897.

- 334 9. Astrand A, Saxin C, Sjöholm A, et al. Poststroke Physical Activity Levels No Higher in  
335 Rehabilitation than in the Acute Hospital. *J Stroke Cerebrovasc Dis*. 2016;25(4):938-945.
- 336 10. Langhorne P, Wu O, Rodgers H, Ashburn A, Bernhardt J. A Very Early Rehabilitation  
337 Trial after stroke (AVERT): a Phase III, multicentre, randomised controlled trial. *Health*  
338 *Technol Assess*. 2017;21(54):1-120.
- 339 11. Sundseth A, Thommessen B, Ronning OM. Outcome after mobilization within 24 hours  
340 of acute stroke: a randomized controlled trial. *Stroke*. 2012;43(9):2389-2394.
- 341 12. Liu N, Cadilhac DA, Andrew NE, et al. Randomized controlled trial of early  
342 rehabilitation after intracerebral hemorrhage stroke: difference in outcomes within 6  
343 months of stroke. *Stroke*. 2014;45(12):3502-3507.
- 344 13. Marzolini S, Robertson AD, Oh P, et al. Aerobic Training and Mobilization Early Post-  
345 stroke: Cautions and Considerations. *Front Neurol*. 2019;10:1187.
- 346 14. Billinger SA, Craig JC, Kwapiszeski SJ, et al. Dynamics of middle cerebral artery blood  
347 flow velocity during moderate-intensity exercise. *J Appl Physiol (1985)*.  
348 2017;122(5):1125-1133.
- 349 15. Ward JL, Craig JC, Liu Y, et al. Effect of healthy aging and sex on middle cerebral artery  
350 blood velocity dynamics during moderate-intensity exercise. *Am J Physiol Heart Circ*  
351 *Physiol*. 2018;315(3):H492-H501.
- 352 16. Witte E, Liu Y, Ward JL, et al. Exercise intensity and middle cerebral artery dynamics in  
353 humans. *Respir Physiol Neurobiol*. 2019;262:32-39.
- 354 17. Billinger SA, Whitaker AA, Morton A, et al. Pilot Study to Characterize Middle Cerebral  
355 Artery Dynamic Response to an Acute Bout of Moderate Intensity Exercise at 3- and 6-  
356 Months Poststroke. *J Am Heart Assoc*. 2021;10(3):e017821.

- 357 18. Kempf KS, Whitaker AA, Lui Y, et al. The Effect of Stroke on Middle Cerebral Artery  
358 Blood Flow Velocity Dynamics During Exercise. *J Neurol Phys Ther.* 2019;43(4):212-  
359 219.
- 360 19. Perdomo SJ, Ward J, Liu Y, et al. Cardiovascular disease risk is associated with middle  
361 cerebral artery blood flow velocity in older adults. *Cardiopulm Phys Ther J.*  
362 2020;31(2):38-46.
- 363 20. Morton A, Myers M, Whitaker AA, et al. Optimizing Recruitment Strategies and  
364 Physician Engagement for Stroke Recovery Research. *J Neurol Phys Ther.*  
365 2021;45(1):41-45.
- 366 21. Bernhardt J, Churilov L, Ellery F, et al. Prespecified dose-response analysis for A Very  
367 Early Rehabilitation Trial (AVERT). *Neurology.* 2016;86(23):2138-2145.
- 368 22. Camarda SR, Tebexreni AS, Pafaro CN, et al. Comparison of maximal heart rate using  
369 the prediction equations proposed by Karvonen and Tanaka. *Arq Bras Cardiol.*  
370 2008;91(5):311-314.
- 371 23. Brawner CA, Ehrman JK, Schairer JR, Cao JJ, Keteyian SJ. Predicting maximum heart  
372 rate among patients with coronary heart disease receiving beta-adrenergic blockade  
373 therapy. *Am Heart J.* 2004;148(5):910-914.
- 374 24. Kaufman CS, Bai SX, Ward JL, Eickmeyer SM, Billinger SA. Middle cerebral artery  
375 velocity dynamic response profile during exercise is attenuated following multiple  
376 ischemic strokes: a case report. *Physiol Rep.* 2019;7(21):e14268.
- 377 25. Laboratories ATSCoPSfCPF. ATS statement: guidelines for the six-minute walk test. *Am*  
378 *J Respir Crit Care Med.* 2002;166(1):111-117.

- 379 26. Perera S, Mody SH, Woodman RC, Studenski SA. Meaningful change and  
380 responsiveness in common physical performance measures in older adults. *J Am Geriatr*  
381 *Soc.* 2006;54(5):743-749.
- 382 27. Diserens K, Moreira T, Hirt L, et al. Early mobilization out of bed after ischaemic stroke  
383 reduces severe complications but not cerebral blood flow: a randomized controlled pilot  
384 trial. *Clin Rehabil.* 2012;26(5):451-459.
- 385 28. Billinger SA, Matlaga AE, Ashenden AL, Lentz AA, Harter G, Rippee MA. Aerobic  
386 exercise in subacute stroke improves cardiovascular health and physical performance. *J*  
387 *Neurol Phys Ther.* 2012;36(4):159-165.
- 388 29. Palmefors H, DuttaRoy S, Rundqvist B, Borjesson M. The effect of physical activity or  
389 exercise on key biomarkers in atherosclerosis--a systematic review. *Atherosclerosis.*  
390 2014;235(1):150-161.
- 391 30. Luca M, Luca A. Oxidative Stress-Related Endothelial Damage in Vascular Depression  
392 and Vascular Cognitive Impairment: Beneficial Effects of Aerobic Physical Exercise.  
393 *Oxid Med Cell Longev.* 2019;2019:8067045.
- 394 31. Ivey FM, Ryan AS, Hafer-Macko CE, Macko RF. Improved cerebral vasomotor  
395 reactivity after exercise training in hemiparetic stroke survivors. *Stroke.*  
396 2011;42(7):1994-2000.
- 397 32. Taty Zau JF, Costa Zeferino R, Sandrine Mota N, et al. Exercise through a cardiac  
398 rehabilitation program attenuates oxidative stress in patients submitted to coronary artery  
399 bypass grafting. *Redox Rep.* 2018;23(1):94-99.

- 400 33. Carter SE, Draijer R, Holder SM, Brown L, Thijssen DHJ, Hopkins ND. Regular walking  
401 breaks prevent the decline in cerebral blood flow associated with prolonged sitting. *J*  
402 *Appl Physiol (1985)*. 2018;125(3):790-798.
- 403 34. Wheeler MJ, Dunstan DW, Ellis KA, et al. Effect of Morning Exercise With or Without  
404 Breaks in Prolonged Sitting on Blood Pressure in Older Overweight/Obese Adults.  
405 *Hypertension*. 2019;73(4):859-867.
- 406 35. Duck-Won O. Community Ambulation: Clinical Criteria for Therapists' Reasoning and  
407 Decision-making in Stroke Rehabilitation. *Int J Phys Med Rehabil*. 2013.
- 408 36. Carvalho LB, Kramer S, Borschmann K, Chambers B, Thijs V, Bernhardt J. Cerebral  
409 haemodynamics with head position changes post-ischaemic stroke: A systematic review  
410 and meta-analysis. *J Cereb Blood Flow Metab*. 2020:271678X20922457.
- 411 37. Treger I, Aidinof L, Lutsky L, Kalichman L. Mean flow velocity in the middle cerebral  
412 artery is associated with rehabilitation success in ischemic stroke patients. *Arch Phys*  
413 *Med Rehabil*. 2010;91(11):1737-1740.
- 414 38. Wheeler MJ, Dunstan DW, Smith B, et al. Morning exercise mitigates the impact of  
415 prolonged sitting on cerebral blood flow in older adults. *J Appl Physiol (1985)*.  
416 2019;126(4):1049-1055.
- 417 39. Biswas A, Oh PI, Faulkner GE, et al. Sedentary time and its association with risk for  
418 disease incidence, mortality, and hospitalization in adults: a systematic review and meta-  
419 analysis. *Ann Intern Med*. 2015;162(2):123-132.
- 420 40. Christmas BCR, Taylor L, Cherif A, Sayegh S, Bailey DP. Breaking up prolonged sitting  
421 with moderate-intensity walking improves attention and executive function in Qatari  
422 females. *PLoS One*. 2019;14(7):e0219565.

- 423 41. Schreiber SJ, Gottschalk S, Weih M, Villringer A, Valdueza JM. Assessment of blood  
424 flow velocity and diameter of the middle cerebral artery during the acetazolamide  
425 provocation test by use of transcranial Doppler sonography and MR imaging. *AJNR Am J*  
426 *Neuroradiol.* 2000;21(7):1207-1211.
- 427 42. Serrador JM, Picot PA, Rutt BK, Shoemaker JK, Bondar RL. MRI measures of middle  
428 cerebral artery diameter in conscious humans during simulated orthostasis. *Stroke.*  
429 2000;31(7):1672-1678.
- 430 43. Giller CA, Bowman G, Dyer H, Mootz L, Krippner W. Cerebral arterial diameters during  
431 changes in blood pressure and carbon dioxide during craniotomy. *Neurosurgery.*  
432 1993;32(5):737-741; discussion 741-732.
- 433 44. Steventon JJ, Hansen AB, Whittaker JR, et al. Cerebrovascular Function in the Large  
434 Arteries Is Maintained Following Moderate Intensity Exercise. *Front Physiol.*  
435 2018;9:1657.
- 436 45. Mijajlovic MD, Pavlovic A, Brainin M, et al. Post-stroke dementia - a comprehensive  
437 review. *BMC Med.* 2017;15(1):11.
- 438 46. Liu J, Wang Y, Akamatsu Y, et al. Vascular remodeling after ischemic stroke:  
439 mechanisms and therapeutic potentials. *Prog Neurobiol.* 2014;115:138-156.
- 440 47. Treger I, Luzki L, Gil M, Ring H. Transcranial Doppler monitoring during language tasks  
441 in stroke patients with aphasia. *Disabil Rehabil.* 2007;29(15):1177-1183.  
442
